# Supplementary material for: Microstructure-driven electrical conductivity optimization in additively manufactured microscale copper interconnects
Source: Royal Society of Chemistry journal article supplement (doi:10.1039/d3ra00611e), 2023-01-01
Supplement: d3ra00611e1.pdf [file d3ra00611e1.pdf]

## Supplementary Information

### Microstructure-driven Electrical Conductivity Optimization in Additively Manufactured Microscale Copper Interconnects

Maxence Menétrey,<sup>a‡</sup> Cathelijm van Nisselroy,<sup>b‡</sup> Mengjia Xu,<sup>b</sup> Julian Hengsteler,<sup>b</sup> Ralph Spolenak,<sup>\*a</sup> Tomaso Zambelli<sup>\*b</sup>

<sup>a</sup> Laboratory for Nanometallurgy, Department of Materials, ETH Zürich, Vladimir-Prelog-Weg 1-5/10, 8093 Zürich, Switzerland, ralph.spolenak@mat.ethz.ch

<sup>b</sup> Laboratory of Biosensors and Bioelectronics, Department of Information Technology and Electrical Engineering, ETH Zürich, Gloriastrasse 35, 8092 Zürich, Switzerland, ztomaso@ethz.ch

‡ These authors contributed equally to this work

\* Corresponding authors

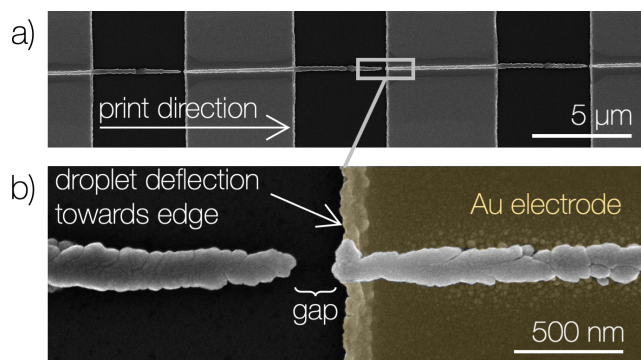

Figure 1: (a) SEM micrograph of a line printed by EHD-RP and displaying a clear disconnection at the transition from the non-conductive Si<sub>3</sub>N<sub>4</sub> wafer and the gold electrode. (b) Enlarged view showing the 200 nm gap. The distance between the nozzle and the substrate was  $\approx 7.5 \mu\text{m}$ .

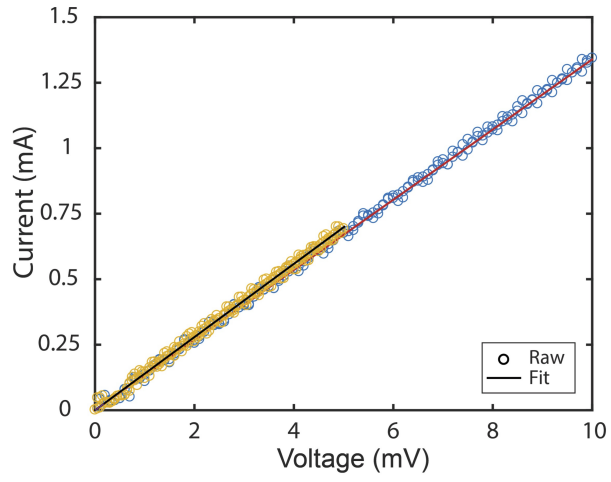

Figure 2: IV curve obtained for the electrical characterization of a  $\Lambda$ -bridge deposited by FluidFM. The measurement is performed in 4-point configuration with 5 and 10 mV sweep.

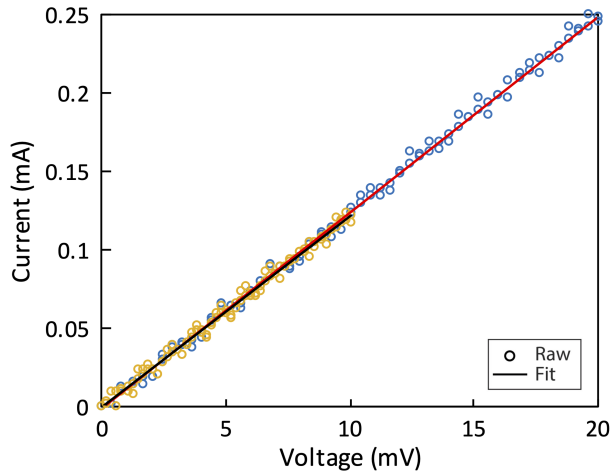

Figure 3: IV curve obtained for the electrical characterization of copper line deposited by EHD-RP. The measurement is performed in 4-point configuration with 10 and 20 mV sweep.

| <i>Process Step</i>            | <i>Parameters</i>                                                                                                                                                                                                                                                                                                                                                                                                                                                                                                                                   |
|--------------------------------|-----------------------------------------------------------------------------------------------------------------------------------------------------------------------------------------------------------------------------------------------------------------------------------------------------------------------------------------------------------------------------------------------------------------------------------------------------------------------------------------------------------------------------------------------------|
| Mask Design & Fabrication      | <p>Mask design in KLayout</p> <p>Mask writing using the DWL 2000 GS (Heidelberg Instruments) on a 5-inch soda lime glass with a 30 nm chromium layer and 500 nm of photoresist (AZ 1505) on top.</p> <p>Development of the photolithography mask in AZ 400K diluted 1:4 in DI water. Washing of the mask in DI water, followed by a chromium wet etch, after which another washing step in DI water is performed.</p> <p>Stripping of the photoresist with acetone, followed by an IPA rinse and blow dry with the nitrogen gun. Ready for use.</p> |
| Wet chemical cleaning of wafer | <p>10 s acetone flush</p> <p>5 min in Acetone (ultrasonic bath)</p> <p>10s IPA flush</p> <p>5 min IPA (ultrasonic bath)</p> <p>Blow dry wafer with nitrogen gun</p>                                                                                                                                                                                                                                                                                                                                                                                 |
| Dehydration Bake               | <p>Hot plate HT-302 D, Torrey Pines Scientific</p> <p>10 min at 200 °C</p>                                                                                                                                                                                                                                                                                                                                                                                                                                                                          |
| Plasma clean                   | <p>Plasma cleaner 100-E Plasma Systems Technics Plasma GmbH</p> <p>2 min at 100 W</p>                                                                                                                                                                                                                                                                                                                                                                                                                                                               |
| Spincoat photoresist S1805     | <p>Spincoater Suess Microtec</p> <p>Ramp (200 rpm/sec) to 500 rpm for 5 s</p> <p>Ramp (1500 rpm/sec) to 3000 rpm for 30</p> <p>Expected thickness = 0.5 µm</p>                                                                                                                                                                                                                                                                                                                                                                                      |
| Softbake                       | <p>Hot plate HT-302 D, Torrey Pines Scientific</p> <p>RT ramp up to 115 °C (240 °C/hr)</p> <p>1 min at 115 °C</p> <p>Cool down to RT</p>                                                                                                                                                                                                                                                                                                                                                                                                            |
| Exposure                       | <p>Mask aligner: Karl Suss MA-5, Suss MicroTec</p> <p>Hard contact, 20 µm alignment gap</p> <p>1 cycle of 11.54 sec (power = 13mW/cm<sup>2</sup> @broadband (CP))</p> <p>Total dose: W = 150 mJ/cm<sup>2</sup></p> <p>For <b>glass</b> wafers: put black foil underneath wafer to absorb UV scattering</p>                                                                                                                                                                                                                                          |
| Development                    | <p>For <b>Si<sub>3</sub>N<sub>4</sub></b> wafers: 10s in a (fresh) bath of MF-319</p> <p>For <b>glass</b> wafers: 5 s in (fresh) bath of MF-319</p> <p>Dip the wafer in DI water (gently)</p> <p>Blow dry N<sub>2</sub> (gently)</p>                                                                                                                                                                                                                                                                                                                |
| Optical Inspection             | Check features under optical light microscope                                                                                                                                                                                                                                                                                                                                                                                                                                                                                                       |
| Evaporation of gold film       | 3 nm Ti, followed by 25 nm Au                                                                                                                                                                                                                                                                                                                                                                                                                                                                                                                       |
| Photoresist Removal (Lift Off) | <p>10 s acetone flush</p> <p>5 min in Acetone (ultrasonic bath)</p> <p>10s IPA flush</p> <p>5 min IPA (ultrasonic bath)</p> <p>Blow dry wafer with nitrogen gun</p>                                                                                                                                                                                                                                                                                                                                                                                 |
| Spincoat photoresist MaN 1420  | <p>Spincoater Suess Microtec</p> <p>Ramp (100 rpm/s) to 500 rpm for 5 s</p> <p>Ramp (1000 rpm/s) to 3000 rpm for 30 s</p> <p>Expected thickness = 2 µm</p>                                                                                                                                                                                                                                                                                                                                                                                          |
| Softbake                       | <p>Hot plate HT-302 D, Torrey Pines Scientific</p> <p>2 min at 100 °C</p>                                                                                                                                                                                                                                                                                                                                                                                                                                                                           |
| Wafer Dicing                   | 20 x 20 mm                                                                                                                                                                                                                                                                                                                                                                                                                                                                                                                                          |
| Photoresist Removal            | <p>10 s acetone flush</p> <p>5 min in Acetone (ultrasonic bath)</p> <p>10s IPA flush</p> <p>5 min IPA (ultrasonic bath)</p> <p>Blow dry wafer with nitrogen gun</p>                                                                                                                                                                                                                                                                                                                                                                                 |
| Optical Inspection             | Check final electrode structures under optical light microscope                                                                                                                                                                                                                                                                                                                                                                                                                                                                                     |

Figure 4: Detailed overview of the lithography process steps for the fabrication of the electrode substrates.
